# Supplementary material for: Functional Nanogel from Natural Substances for Delivery of Doxorubicin
Source: MDPI journal article supplement (doi:10.3390/polym14173694), 2022-09-05
Supplement: s1 [file s1]

# Functional Nanogel from Natural Substances for Delivery of Doxorubicin <sup>†</sup>

Katya Kamenova <sup>1</sup>, Lyubomira Radeva <sup>2</sup>, Krassimira Yoncheva <sup>2</sup>, Filip Ublekov <sup>1</sup>, Martin A. Ravutsov <sup>3</sup>, Maya K. Marinova <sup>3</sup>, Svilen P. Simeonov <sup>3,4</sup>, Aleksander Forsy <sup>5</sup>, Barbara Trzebicka <sup>5</sup> and Petar D. Petrov <sup>1,\*</sup>

<sup>1</sup> Institute of Polymers, Bulgarian Academy of Sciences, 1113 Sofia, Bulgaria

<sup>2</sup> Department of Pharmaceutical Technology and Biopharmaceutics, Faculty of Pharmacy, Medical University of Sofia, 1000 Sofia, Bulgaria

<sup>3</sup> Institute of Organic Chemistry with Centre of Phytochemistry, Bulgarian Academy of Sciences, 1113 Sofia, Bulgaria

<sup>4</sup> Research Institute for Medicines (iMed.Ulissboa), Faculty of Pharmacy, Universidade de Lisboa, 1649-003 Lisbon, Portugal

<sup>5</sup> Centre of Polymer and Carbon Materials, Polish Academy of Sciences, 41-819 Zabrze, Poland

\* Correspondence: ppetrov@polymer.bas.bg; Tel.: +359-2-9796335

<sup>†</sup> In Memory of Professor Andrzej Dworak.

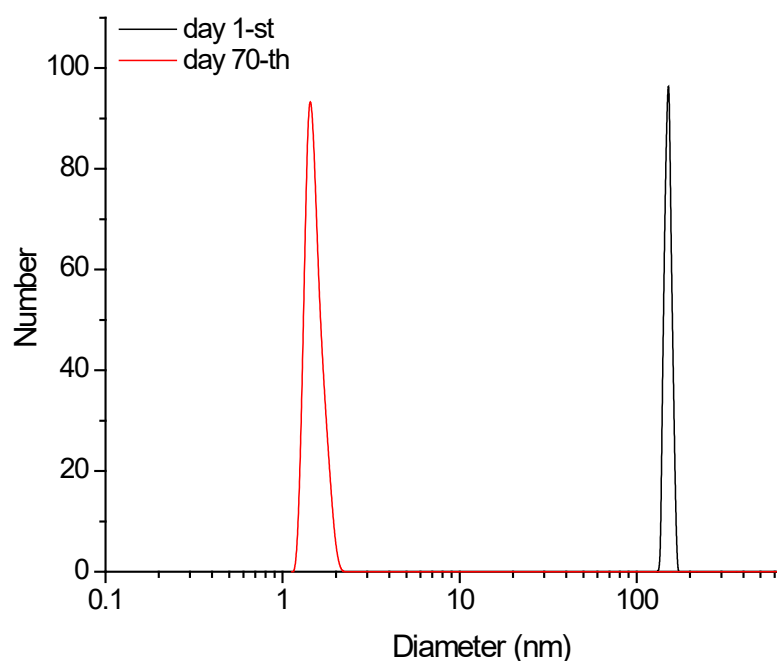

**Figure S1.** Hydrodynamic diameter distribution plot of NG1 in water (pH ~ 6.5). Measurements were made on the first and seventieth day of sample preparation.

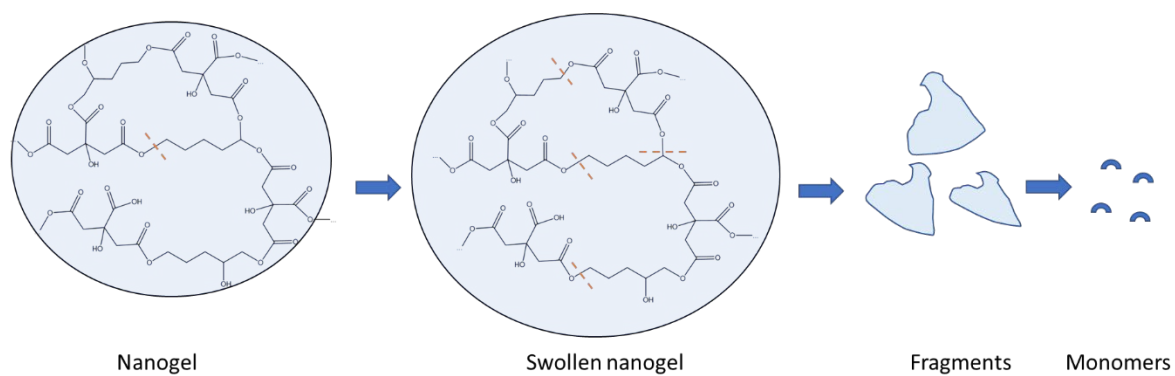

**Figure S2.** Schematic representation of the hydrolysis of nanogel in aqueous media.

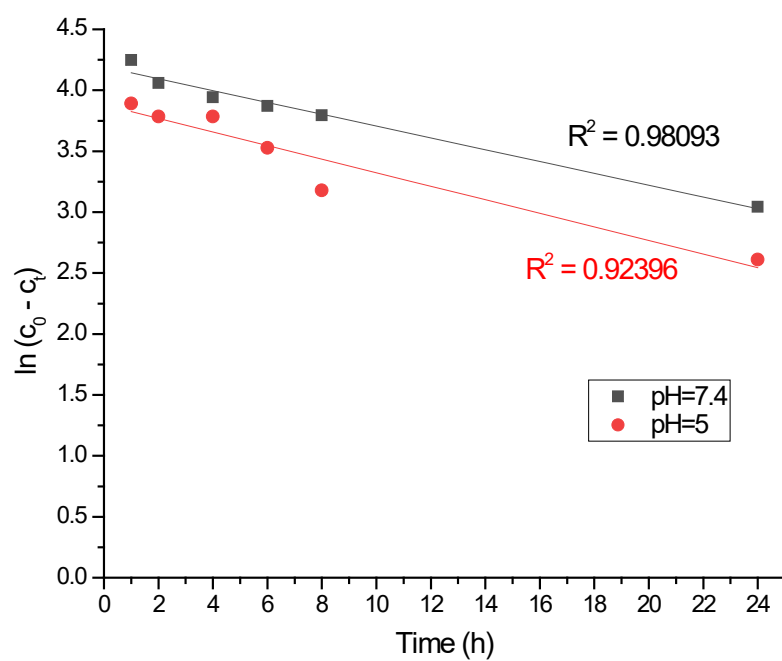

**Figure S3.** Kinetics analysis of DOX release from NG1 in buffer media with pH-values 5.0 and 7.4.
